# Supplementary material for: Trends in Psychotropic Polypharmacy Among Youths Enrolled in Ohio Medicaid, 2002–2008
Source: Atypon-hosted journal article supplement (doi:10.1176/appi.ps.201300410), 2014-07-15
Supplement: appi.ps.201300410.ds001.pdf [file appi.ps.201300410.ds001.pdf]

Appendix Table 1. Demographic and clinical characteristics of Medicaid enrolled youth by eligibility category, Ohio, 2002 and 2008

|                    | Low income |      |        |      |                |         | Disabled |      |       |      |                |         | Foster care |      |       |      |                |         |
|--------------------|------------|------|--------|------|----------------|---------|----------|------|-------|------|----------------|---------|-------------|------|-------|------|----------------|---------|
|                    | 2002       |      | 2008   |      | Percent Change | p-value | 2002     |      | 2008  |      | Percent Change | p-value | 2002        |      | 2008  |      | Percent Change | p-value |
|                    | N          | %    | N      | %    |                |         | N        | %    | N     | %    |                |         | N           | %    | N     | %    |                |         |
| Total Enrollees    | 16,362     |      | 36,813 |      |                |         | 6,061    |      | 8,592 |      |                |         | 3,829       |      | 4,906 |      |                |         |
| <i>Demographic</i> |            |      |        |      |                |         |          |      |       |      |                |         |             |      |       |      |                |         |
| Age, years         |            |      |        |      |                | <.001   |          |      |       |      |                | <.001   |             |      |       |      |                | <.001   |
| ≤ 6                | 1,515      | 9.3  | 2,979  | 8.1  | -12.6          |         | 662      | 10.9 | 770   | 9.0  | -18.0          |         | 256         | 6.7  | 262   | 5.3  | -20.2          |         |
| 7-12               | 9,597      | 58.6 | 20,701 | 56.2 | -4.1           |         | 3,229    | 53.3 | 4,151 | 48.3 | -9.3           |         | 2,012       | 52.5 | 2,154 | 43.9 | -16.4          |         |
| 13-17              | 5,250      | 32.1 | 13,133 | 35.7 | 11.2           |         | 2,170    | 35.8 | 3,671 | 42.7 | 19.4           |         | 1,561       | 40.8 | 2,490 | 50.7 | 24.5           |         |
| Race               |            |      |        |      |                | .790    |          |      |       |      |                | >.99    |             |      |       |      |                | .876    |
| White              | 13,748     | 84.0 | 30,353 | 82.4 | -1.9           |         | 4,396    | 72.5 | 6,238 | 72.6 | .1             |         | 2,418       | 63.1 | 3,029 | 61.7 | -2.2           |         |
| Black              | 2,509      | 15.3 | 6,111  | 16.6 | 8.3            |         | 1,592    | 26.3 | 2,221 | 25.8 | -1.6           |         | 1,360       | 35.5 | 1,806 | 36.8 | 3.6            |         |
| Other <sup>a</sup> | 105        | .6   | 349    | .9   | 48.4           |         | 73       | 1.2  | 133   | 1.5  | 29.2           |         | 51          | 1.3  | 71    | 1.4  | 9.0            |         |
| Gender             |            |      |        |      |                | <.001   |          |      |       |      |                | .908    |             |      |       |      |                | >.99    |
| Female             | 4,940      | 30.2 | 11,988 | 32.6 | 7.8            |         | 1,754    | 28.9 | 2,410 | 28.0 | -3.1           |         | 1,327       | 34.7 | 1,714 | 34.9 | .8             |         |
| Male               | 11,422     | 69.8 | 24,825 | 67.4 | -3.4           |         | 4,307    | 71.1 | 6,182 | 72.0 | 1.2            |         | 2,502       | 65.3 | 3,192 | 65.1 | -.4            |         |
| Residence          |            |      |        |      |                | <.001   |          |      |       |      |                | >.99    |             |      |       |      |                | >.99    |
| Urban              | 11,621     | 71.0 | 27,519 | 74.7 | 5.3            |         | 4,820    | 79.5 | 6,859 | 79.8 | .4             |         | 2,996       | 78.2 | 3,992 | 81.4 | 4.0            |         |
| Rural              | 4,727      | 28.9 | 9,262  | 25.2 | -12.9          |         | 1,235    | 20.4 | 1,725 | 20.1 | -1.5           |         | 701         | 18.3 | 883   | 18.0 | -1.7           |         |
| <i>Clinical</i>    |            |      |        |      |                |         |          |      |       |      |                |         |             |      |       |      |                |         |

Data Supplement for Fontanella et al. (10.1176/appi.ps.201300410)

|                                      | Low income |      |        |      |                |         | Disabled |      |       |      |                |         | Foster care |      |       |      |                |         |
|--------------------------------------|------------|------|--------|------|----------------|---------|----------|------|-------|------|----------------|---------|-------------|------|-------|------|----------------|---------|
|                                      | 2002       |      | 2008   |      | Percent Change | p-value | 2002     |      | 2008  |      | Percent Change | p-value | 2002        |      | 2008  |      | Percent Change | p-value |
|                                      | N          | %    | N      | %    |                |         | N        | %    | N     | %    |                |         | N           | %    |       |      |                |         |
| Primary diagnosis                    |            |      |        |      |                |         |          |      |       |      |                |         |             |      |       |      |                |         |
| No diagnosis                         | 2,277      | 13.9 | 4,174  | 11.3 | -18.5          | <.001   | 1,333    | 22.0 | 2,105 | 24.5 | 11.4           | <.001   | 401         | (0.5 | 543   | 11.1 | 5.7            | .563    |
| ADHD                                 | 7,502      | 45.8 | 20,299 | 55.1 | 20.3           | <.001   | 1,519    | 25.1 | 2,331 | 27.1 | 8.2            | <.001   | 1,363       | 35.6 | 1,990 | 40.6 | 14.0           | <.001   |
| Adjustment                           | 854        | 5.2  | 142    | 3.9  | -26.1          | <.001   | 113      | 1.9  | 116   | 1.3  | -27.6          | .009    | 286         | 7.5  | 243   | 4.9  | -33.7          | <.001   |
| Anxiety                              | 409        | 2.5  | 1,151  | 3.1  | 25.1           | <.001   | 76       | 1.2  | 159   | 1.8  | 47.6           | .027    | 203         | 5.3  | 307   | 6.3  | 18.0           | .229    |
| Autism                               | 22         | .1   | 159    | .4   | 221.2          | <.001   | 159      | 2.6  | 342   | 4.0  | 51.7           | <.001   | 6           | .2   | 23    | .5   | 199.2          | .004    |
| Disruptive                           | 1,593      | 9.7  | 3,023  | 8.2  | -15.7          | <.001   | 403      | 6.6  | 496   | 5.8  | -13.2          | >.99    | 454         | 1.9  | 557   | 11.3 | -4.2           | >.99    |
| Mood                                 | 1,249      | 7.6  | 3,317  | 9.0  | 18.0           | <.001   | 294      | 4.8  | 623   | 7.2  | 49.5           | <.001   | 337         | 8.8  | 570   | 11.6 | 32.0           | <.001   |
| Mental retardation                   | 1,491      | 9.1  | 246    | .7   | -92.7          | <.001   | 1,734    | 28.6 | 1,155 | 13.4 | -53.0          | <.001   | 420         | 11.0 | 84    | 1.7  | -84.4          | <.001   |
| Schizophrenia                        | 48         | .3   | 105    | .3   | -2.8           | >.99    | 39       | .6   | 47    | .5   | -15.0          | >.99    | 25          | .6   | 31    | .6   | -3.2           | >.99    |
| Other mental health <sup>b</sup>     | 917        | 5.6  | 2,919  | 7.9  | 41.5           | <.001   | 391      | 6.4  | 1,218 | 14.2 | 119.7          | <.001   | 334         | 8.7  | 558   | 11.4 | 30.4           | <.001   |
| Other psychiatric disorder           |            |      |        |      |                |         |          |      |       |      |                |         |             |      |       |      |                |         |
| 0                                    | 7,954      | 62.8 | 20,873 | 70.9 | 12.9           | <.001   | 2,243    | 49.8 | 3,165 | 52.1 | 4.7            | <.001   | 1,581       | 50.7 | 2,158 | 54.0 | 6.6            | <.001   |
| 1                                    | 3,544      | 28.0 | 6,548  | 22.2 | -20.5          | <.001   | 1,516    | 33.7 | 1,872 | 30.8 | -9.2           | <.001   | 1,020       | 32.7 | 1,165 | 29.2 | -10.8          | <.001   |
| ≥ 2                                  | 1,169      | 9.2  | 2,022  | 6.9  | -25.6          | <.001   | 745      | 16.5 | 1,036 | 17.1 | 3.1            | .001    | 519         | 16.6 | 671   | 16.8 | 1.0            | .027    |
| Any medical comorbidity              | 1,437      | 8.8  | 3,877  | 10.5 | 19.9           | <.001   | 1,305    | 21.5 | 2,045 | 23.8 | 10.5           | <.001   | 285         | 6.7  | 366   | 7.5  | 11.2           | <.001   |
| Inpatient psychiatric visits, M (SD) | .1         | .3   | .1     | .3   | -8.6           | .003    | .10      | .5   | .09   | .4   | -10.0          | .124    | .1          | .5   | .11   | .5   | 8.3            | >.99    |
| Outpatient psychiatric               | 9.0        | 10.7 | 8.9    | 11.1 | 3.4            | .129    | 14.0     | 13.8 | 10.7  | 13.4 | -2.7           | <.001   | 13.1        | 14.4 | 14.8  | 17.1 | 18.9           | .012    |

Data Supplement for Fontanella et al. (10.1176/appi.ps.201300410)

|                | Low income |   |      |   |                |         | Disabled |   |      |   |                |         | Foster care |   |      |   |                |         |
|----------------|------------|---|------|---|----------------|---------|----------|---|------|---|----------------|---------|-------------|---|------|---|----------------|---------|
|                | 2002       |   | 2008 |   | Percent Change | p-value | 2002     |   | 2008 |   | Percent Change | p-value | 2002        |   | 2008 |   | Percent Change | p-value |
|                | N          | % | N    | % |                |         | N        | % | N    | % |                |         | N           | % | N    | % |                |         |
| visits, M (SD) |            |   |      |   |                |         |          |   |      |   |                |         |             |   |      |   |                |         |

Abbreviations: ADHD = Attention deficit hyperactivity disorder.

Note. p-values are based on chi-square linear trend tests for all seven years and have been adjusted using the Holm's procedure in order to conserve the type I error at 0.05

<sup>a</sup>Other race includes Hispanic, Asian, American Indian, Pacific Islander <sup>b</sup>Other mental health disorder includes ICD-9 Codes 296-319 not included in above categories.
